# Supplementary material
Source: Springer Nature journal article supplement (https://www.springermedizin.de/resource/supplementary/12871_2009_77_MOESM2_ESM.pdf/9428826)

**A**

**It should not be allowed**

**The coroner**

**The researcher**

**General practitioner**

**Closest relative**

**Treating clinician /  
ICU consultant**

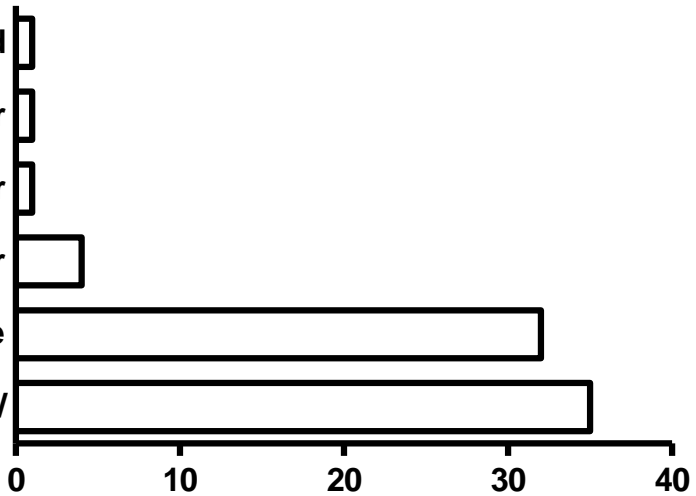

**B**

**Closest relative +  
General practitioner**

**Closest relative + Treating  
clinician / ICU consultant**

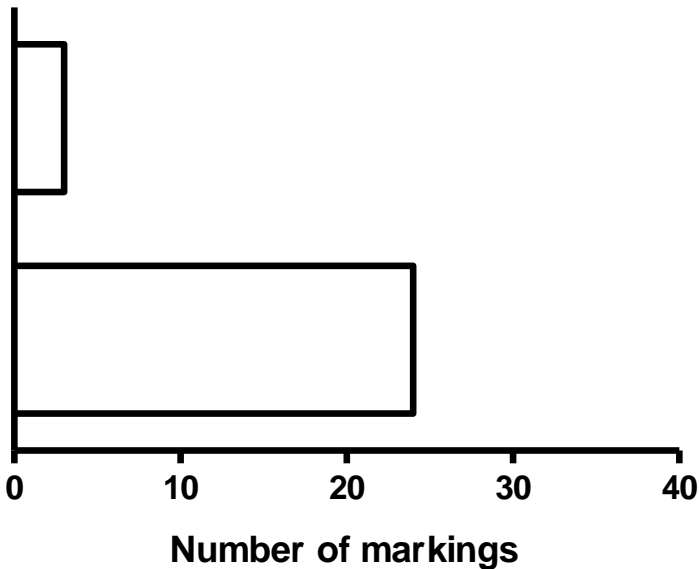

Supplement: MOESM2 [file 9428826]
